# Supplementary material for: Elevated Levels of Circulating Biomarkers Related to Leaky Gut Syndrome and Bacterial Translocation Are Associated With Graves’ Disease
Source: Front Endocrinol (Lausanne). 2021 Dec 16;12:796212. doi: 10.3389/fendo.2021.796212 (PMC8716831; doi:10.3389/fendo.2021.796212)
Supplement: Supplementary file 1 [file Table_1.xlsx]

## Sheet: Sheet1
						Temperature(¡C)	1	2	3	4	5	6	7	8	9	10	11	12
						29.9	0.1029	0.1171	0.099	0.1814	0.1407	0.1064	0.1104	0.1199	0.0984	0.1088	0.1652	0.0902
							0.1151	0.1139	0.1436	0.1121	0.0912	0.1294	0.1025	0.1167	0.097	0.1231	0.1359	0.1991
							0.1399	0.1639	0.1063	0.0956	0.1223	0.0995	0.14	0.1128	0.1306	0.1292	0.1352	0.1354
							0.1904	0.1955	0.1709	0.1084	0.2424	0.142	0.1699	0.1201	0.1257	0.1187	0.1616	0.1424
							0.2816	0.1165	0.1148	0.1089	0.1303	0.1667	0.0972	0.107	0.1223	0.1557	0.1479	0.1477
							0.3519	0.127	0.1227	0.1635	0.1407	0.1613	0.1011	0.0908	0.203	0.2784	0.2149	0.2773
							0.6242	0.124	0.1657	0.1426	0.1598	0.1354	0.1005	0.1059	0.1555	0.1511	0.1899	0.1748
							0.8041	0.0924	0.3883	0.1012	0.1175	0.1013	0.1108	0.1004	0.1685	0.1197	0.1777	0.1608
	Temperature(¡C)	1	2	3	4	5	6	7	8	9	10	11	12
	29.9	0.1041	0.1195	0.0947	0.1807	0.1451	0.1012	0.1103	0.117	0.0999	0.1095	0.161	0.0844
		0.1141	0.115	0.144	0.1116	0.0944	0.129	0.108	0.1207	0.0943	0.1218	0.134	0.2058
		0.1412	0.1646	0.1066	0.0956	0.1235	0.1017	0.1398	0.112	0.1311	0.1292	0.1367	0.1345
		0.1916	0.1963	0.1699	0.1078	0.2423	0.145	0.1692	0.1203	0.1196	0.1146	0.1634	0.1422
		0.2822	0.1165	0.1149	0.1099	0.131	0.1664	0.0972	0.1135	0.1259	0.155	0.1486	0.1474
		0.3563	0.1262	0.1233	0.1644	0.1411	0.164	0.1059	0.0917	0.2032	0.2838	0.2132	0.2702
		0.6293	0.125	0.1636	0.1423	0.1658	0.1339	0.1013	0.1062	0.1551	0.1314	0.2139	0.1739
		0.8037	0.0933	0.3941	0.1017	0.1209	0.1033	0.1162	0.1014	0.1655	0.1167	0.1787	0.1568
